# Supplementary material for: Autologous tumor cell vaccination combined with systemic CpG-B and IFN-α promotes immune activation and induces clinical responses in patients with metastatic renal cell carcinoma: a phase II trial
Source: Springer Nature journal article supplement (doi:10.1007/s00262-019-02320-0), 2019-03-09
Supplement: MOESM1 [file 16535920]

**Supplemental table 1. Adverse events**

| <b>Adverse Event</b> | <b>Any grade</b> | <b>Grade 1</b> | <b>Grade 2</b> | <b>Grade 3 or 4</b> |
|----------------------|------------------|----------------|----------------|---------------------|
| Fatigue              | 13               | 7              | 5              | 1                   |
| Fever                | 10               | 10             |                |                     |
| GGT elevation        | 10               | 3              | 1              | 6                   |
| Anemia               | 8                | 1              | 5              | 2                   |
| ALP elevation        | 6                |                | 3              | 3                   |
| Anorexia             | 6                | 5              | 1              |                     |
| Malaise              | 6                | 6              |                |                     |
| Night sweats         | 6                | 5              | 1              |                     |
| Skin rash            | 6                | 6              |                |                     |
| Chills               | 5                | 5              |                |                     |
| Creatinine elevation | 5                | 5              |                |                     |
| Itch                 | 5                | 5              |                |                     |
| Pain                 | 5                | 5              |                |                     |
| Cough                | 4                | 4              |                |                     |
| Dizziness            | 4                | 3              |                | 1                   |
| Nausea               | 4                | 4              |                |                     |
| Myalgia              | 3                | 3              |                |                     |
| Abdominal pain       | 2                | 2              |                |                     |
| Constipation         | 2                | 2              |                |                     |
| Aphasia              | 1                |                |                | 1                   |
| Attention disorder   | 1                | 1              |                |                     |
| Chest pain           | 1                | 1              |                |                     |
| Diarrhea             | 1                | 1              |                |                     |
| Disturbed balance    | 1                |                |                | 1                   |
| Dry skin             | 1                | 1              |                |                     |
| Dyspnea              | 1                |                | 1              |                     |
| Hemoptysis           | 1                | 1              |                |                     |
| Headache             | 1                | 1              |                |                     |
| Hearing loss         | 1                | 1              |                |                     |
| Hemiplegia           | 1                |                |                | 1                   |
| Hypertension         | 1                | 1              |                |                     |
| Insomnia             | 1                | 1              |                |                     |
| Melena               | 1                |                |                | 1                   |
| Nycturia             | 1                | 1              |                |                     |
| Edema                | 1                |                | 1              |                     |
| Pancreatitis         | 1                |                | 1              |                     |
| Rectal blood loss    | 1                | 1              |                |                     |
| Rhinitis             | 1                | 1              |                |                     |
| Sensory Neuropathy   | 1                |                |                | 1                   |
| Vomiting             | 1                | 1              |                |                     |

Abbreviations: GGT, gamma-glutamyl transferase; ALP, Alkaline phosphatase

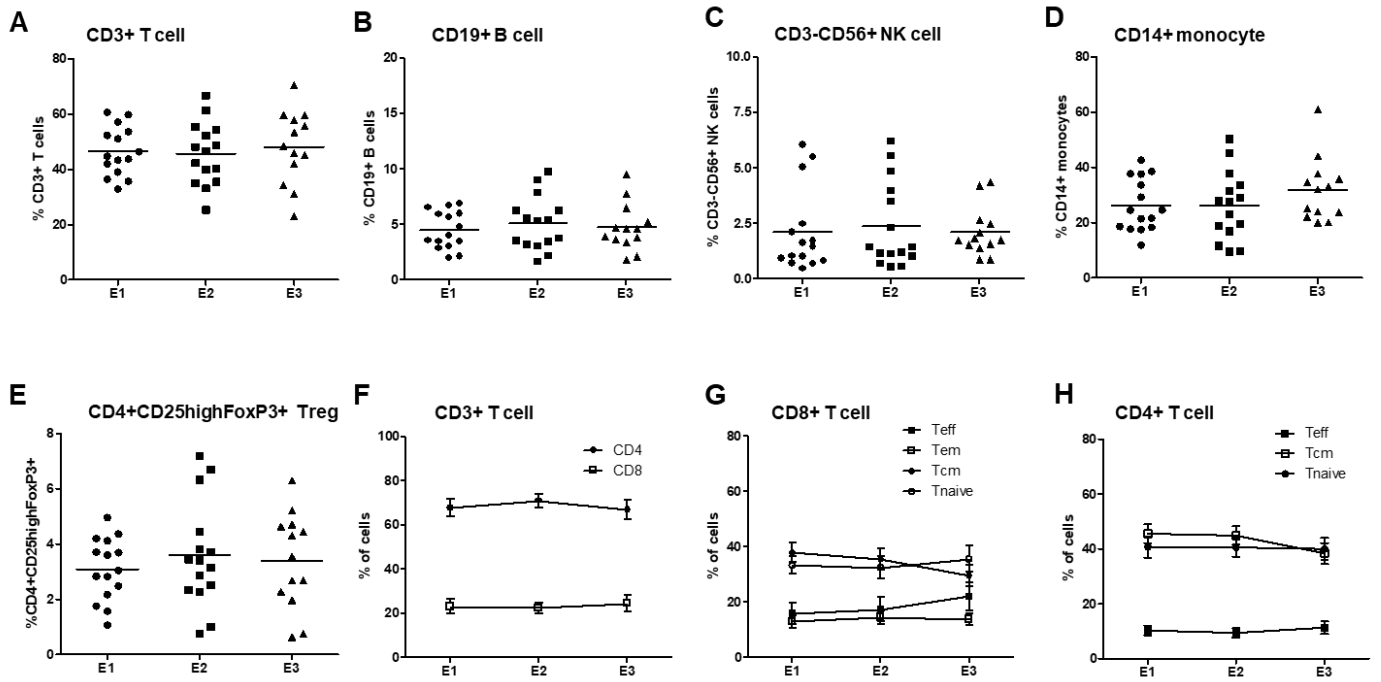

**Supplemental figure 1** Frequencies of circulating CD3<sup>+</sup> T cells (A), CD19<sup>+</sup> B cells (B), CD3<sup>-</sup>CD56<sup>+</sup> NK cells (C), CD14<sup>+</sup> classical monocytes (D) and CD4<sup>+</sup>CD25<sup>hi</sup>FoxP3<sup>+</sup> Tregs (E) and frequencies of circulating CD4<sup>+</sup> T cells, CD8<sup>+</sup> T cells (F) and CD4<sup>+</sup> (G) or CD8<sup>+</sup> (H) Tn, Teff, Tcm or Tem cells at baseline (E1), third vaccination (E2), and follow-up (7-14 weeks, E3).

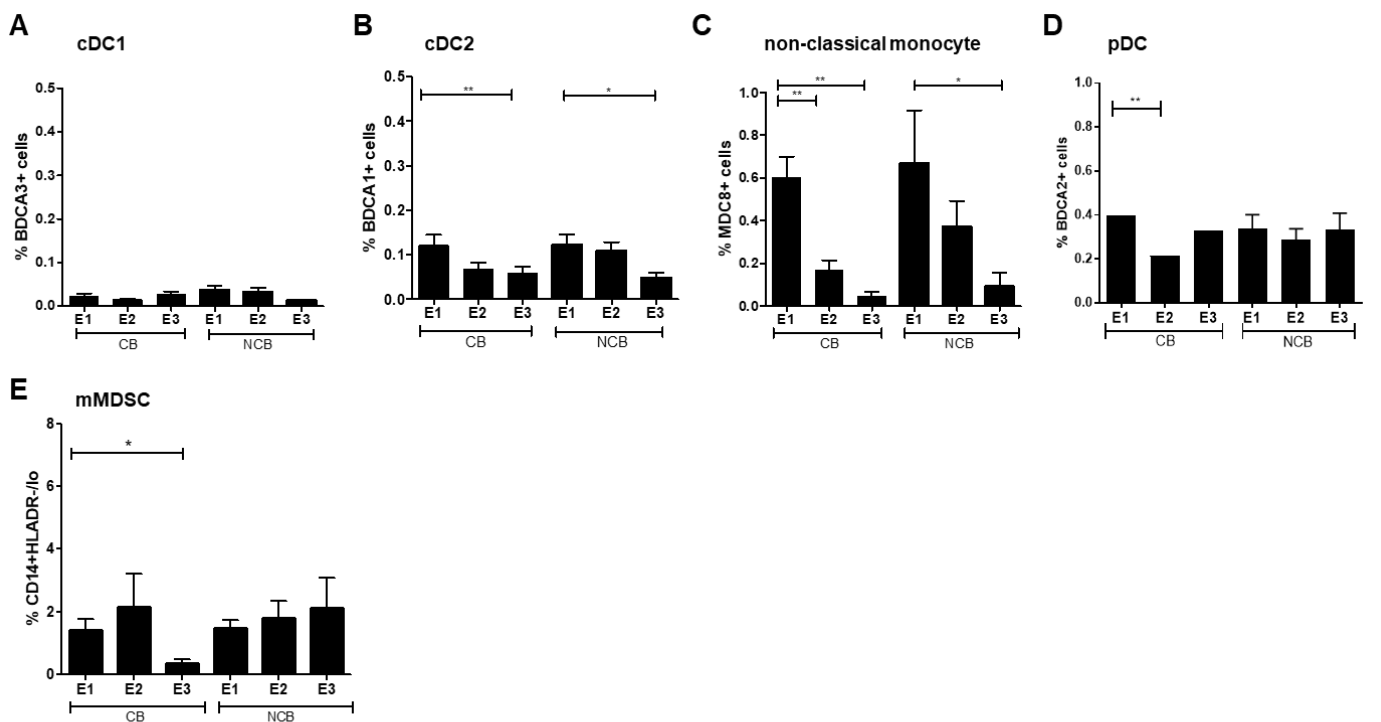

**Supplemental figure 2** Comparative analysis of PBDC frequencies between patients with clinical benefit (CB: stable disease [SD], partial response [PR] and complete response [CR]) and patients with no clinical benefit (NCB: progressive disease [PD]). at baseline (E1), third vaccination (E2), and follow-up (7-14 weeks, E3).
